# Supplementary material
Source: PubMed Central journal article supplement (PMC6443248)
Supplement: NIHMS881988-supplement-2.pdf [file NIHMS881988-supplement-2.pdf]

SUPPLEMENTAL ONLINE MATERIAL

SUPPLEMENTAL RESULTS

**Supplemental Table 1.** Number of cells, amount of carbon assimilated, measured analyte (H<sub>2</sub>S, Fe<sup>3+</sup>, Fe<sup>2+</sup>, and SO<sub>4</sub><sup>2-</sup>) where applicable, and calculated amounts of energy available per mol electron transferred during the specified times in cultures of *Acidianus* sp. DS80 grown at 80°C in base salts medium (pH 3.0) with CO<sub>2</sub> as the carbon source, H<sub>2</sub> as electron donor, and S<sup>o</sup> as electron acceptor.

| Substrate H <sub>2</sub> / S <sup>o</sup> (e <sup>-</sup> donor/acceptor) |                        |                           |                         |                         |                         |                                      |                                                 |
|---------------------------------------------------------------------------|------------------------|---------------------------|-------------------------|-------------------------|-------------------------|--------------------------------------|-------------------------------------------------|
| Time                                                                      | Cells                  | CO <sub>2</sub><br>(fmol) | H <sub>2</sub> S<br>(M) | Fe <sup>3+</sup><br>(M) | Fe <sup>2+</sup><br>(M) | SO <sub>4</sub> <sup>2-</sup><br>(M) | ΔG<br>(kJ (mol e <sup>-</sup> ) <sup>-1</sup> ) |
| 0                                                                         | 2.66 x 10 <sup>5</sup> | 4.07 x 10 <sup>6</sup>    | 2.95 x 10 <sup>-5</sup> | N/A                     | N/A                     | N/A                                  | -28.20                                          |
| 24                                                                        | 2.66 x 10 <sup>5</sup> | 4.10 x 10 <sup>6</sup>    | 2.95 x 10 <sup>-5</sup> | N/A                     | N/A                     | N/A                                  | -28.20                                          |
| 48                                                                        | 1.10 x 10 <sup>6</sup> | 4.74 x 10 <sup>6</sup>    | 5.61 x 10 <sup>-5</sup> | N/A                     | N/A                     | N/A                                  | -27.25                                          |
| 72                                                                        | 2.76 x 10 <sup>6</sup> | 6.15 x 10 <sup>6</sup>    | 1.18 x 10 <sup>-4</sup> | N/A                     | N/A                     | N/A                                  | -26.15                                          |
| 96                                                                        | 4.56 x 10 <sup>6</sup> | 1.14 x 10 <sup>7</sup>    | 2.57 x 10 <sup>-4</sup> | N/A                     | N/A                     | N/A                                  | -25.01                                          |
| 120                                                                       | 5.73 x 10 <sup>6</sup> | 1.49 x 10 <sup>7</sup>    | 4.62 x 10 <sup>-4</sup> | N/A                     | N/A                     | N/A                                  | -24.15                                          |
| 144                                                                       | 7.59 x 10 <sup>6</sup> | 2.09 x 10 <sup>7</sup>    | 7.35 x 10 <sup>-4</sup> | N/A                     | N/A                     | N/A                                  | -23.47                                          |
| 168                                                                       | 8.07 x 10 <sup>6</sup> | 2.07 x 10 <sup>7</sup>    | 9.46 x 10 <sup>-4</sup> | N/A                     | N/A                     | N/A                                  | -23.10                                          |
| 192                                                                       | 7.70 x 10 <sup>6</sup> | 2.04 x 10 <sup>7</sup>    | 1.08 x 10 <sup>-3</sup> | N/A                     | N/A                     | N/A                                  | -22.90                                          |

Abbreviations: N/A, Not Applicable.

34 **Supplemental Table 2.** Number of cells, amount of carbon assimilated, measured analyte (H<sub>2</sub>S,  
 35 Fe<sup>3+</sup>, Fe<sup>2+</sup>, and SO<sub>4</sub><sup>2-</sup>) where applicable, and calculated amounts of energy available per mol  
 36 electron transferred during the specified times in cultures of *Acidianus* sp. DS80 grown at 80°C  
 37 in base salts medium (pH 3.0) with CO<sub>2</sub> as the carbon source, S<sup>o</sup> as the electron donor, and Fe<sup>3+</sup>  
 38 as the electron acceptor.  
 39

| Substrate S <sup>o</sup> / Fe <sup>3+</sup> (e <sup>-</sup> donor/acceptor) |                        |                           |                         |                         |                         |                                                   |                                                 |
|-----------------------------------------------------------------------------|------------------------|---------------------------|-------------------------|-------------------------|-------------------------|---------------------------------------------------|-------------------------------------------------|
| Time                                                                        | Cells                  | CO <sub>2</sub><br>(fmol) | H <sub>2</sub> S<br>(M) | Fe <sup>3+</sup><br>(M) | Fe <sup>2+</sup><br>(M) | SO <sub>4</sub> <sup>2-</sup><br>(M) <sup>1</sup> | ΔG<br>(kJ (mol e <sup>-</sup> ) <sup>-1</sup> ) |
| 0                                                                           | 2.04 x 10 <sup>5</sup> | 4.21 x 10 <sup>6</sup>    | N/A                     | 9.25 x 10 <sup>-3</sup> | B.D.                    | 0.00                                              | -41.83                                          |
| 24                                                                          | 2.04 x 10 <sup>5</sup> | 4.33 x 10 <sup>6</sup>    | N/A                     | 9.24 x 10 <sup>-3</sup> | 1.00 x 10 <sup>-5</sup> | 1.67 x 10 <sup>-6</sup>                           | -82.95                                          |
| 48                                                                          | 2.10 x 10 <sup>5</sup> | 4.32 x 10 <sup>6</sup>    | N/A                     | 9.22 x 10 <sup>-3</sup> | 2.88 x 10 <sup>-5</sup> | 4.81 x 10 <sup>-6</sup>                           | -79.84                                          |
| 72                                                                          | 2.46 x 10 <sup>5</sup> | 4.21 x 10 <sup>6</sup>    | N/A                     | 9.18 x 10 <sup>-3</sup> | 7.48 x 10 <sup>-5</sup> | 1.25 x 10 <sup>-5</sup>                           | -77.02                                          |
| 96                                                                          | 2.57 x 10 <sup>6</sup> | 6.67 x 10 <sup>6</sup>    | N/A                     | 8.36 x 10 <sup>-3</sup> | 8.96 x 10 <sup>-4</sup> | 1.49 x 10 <sup>-4</sup>                           | -69.46                                          |
| 120                                                                         | 4.62 x 10 <sup>6</sup> | 1.29 x 10 <sup>7</sup>    | N/A                     | 7.01 x 10 <sup>-3</sup> | 2.24 x 10 <sup>-3</sup> | 3.73 x 10 <sup>-4</sup>                           | -66.24                                          |
| 144                                                                         | 6.14 x 10 <sup>6</sup> | 1.98 x 10 <sup>7</sup>    | N/A                     | 5.57 x 10 <sup>-3</sup> | 3.68 x 10 <sup>-3</sup> | 6.14 x 10 <sup>-4</sup>                           | -64.06                                          |
| 168                                                                         | 6.87 x 10 <sup>6</sup> | 2.49 x 10 <sup>7</sup>    | N/A                     | 4.45 x 10 <sup>-3</sup> | 4.81 x 10 <sup>-3</sup> | 8.01 x 10 <sup>-4</sup>                           | -63.53                                          |
| 192                                                                         | 8.09 x 10 <sup>6</sup> | 2.73 x 10 <sup>7</sup>    | N/A                     | 2.55 x 10 <sup>-3</sup> | 6.70 x 10 <sup>-3</sup> | 1.12 x 10 <sup>-3</sup>                           | -59.88                                          |
| 216                                                                         | 1.01 x 10 <sup>7</sup> | 3.47 x 10 <sup>7</sup>    | N/A                     | 1.85 x 10 <sup>-3</sup> | 7.40 x 10 <sup>-3</sup> | 1.23 x 10 <sup>-3</sup>                           | -58.61                                          |
| 240                                                                         | 1.03 x 10 <sup>7</sup> | 3.10 x 10 <sup>7</sup>    | N/A                     | 1.11 x 10 <sup>-3</sup> | 8.14 x 10 <sup>-3</sup> | 1.36 x 10 <sup>-3</sup>                           | -56.81                                          |

40 <sup>1</sup>Calculated by subtracting SO<sub>4</sub><sup>2-</sup> in cultures from SO<sub>4</sub><sup>2-</sup> in abiotic controls.

41 Abbreviations: N/A, Not Applicable; B.D., Below Detection

42 Detection limits for Fe<sup>2+</sup> and SO<sub>4</sub><sup>2-</sup> are 0.3 and 5.0 μM, respectively.

43  
44  
45  
46  
47  
48  
49  
50  
51  
52  
53  
54  
55  
56  
57  
58  
59  
60  
61  
62  
63  
64

65 **Supplemental Table 3.** Number of cells, amount of carbon assimilated, measured analyte (H<sub>2</sub>S,  
66 Fe<sup>3+</sup>, Fe<sup>2+</sup>, and SO<sub>4</sub><sup>2-</sup>) where applicable, and calculated amounts of energy available per mol  
67 electron transferred during the specified times in cultures of *Acidianus* sp. DS80 grown at 80°C  
68 in base salts medium (pH 3.0) with CO<sub>2</sub> as the carbon source, H<sub>2</sub> as the electron donor, and Fe<sup>3+</sup>  
69 as the electron acceptor.  
70

| Substrate H <sub>2</sub> / Fe <sup>3+</sup> (e <sup>-</sup> donor/acceptor) |                        |                           |                         |                         |                         |                                                   |                                                 |
|-----------------------------------------------------------------------------|------------------------|---------------------------|-------------------------|-------------------------|-------------------------|---------------------------------------------------|-------------------------------------------------|
| Time                                                                        | Cells                  | CO <sub>2</sub><br>(fmol) | H <sub>2</sub> S<br>(M) | Fe <sup>3+</sup><br>(M) | Fe <sup>2+</sup><br>(M) | SO <sub>4</sub> <sup>2-</sup><br>(M) <sup>1</sup> | ΔG (kJ<br>(mol e <sup>-</sup> ) <sup>-1</sup> ) |
| 0                                                                           | 1.85 x 10 <sup>5</sup> | 4.28 x 10 <sup>6</sup>    | N/A                     | 9.25 x 10 <sup>-3</sup> | B.D.                    | B/D                                               | -68.56                                          |
| 24                                                                          | 1.95 x 10 <sup>5</sup> | 4.33 x 10 <sup>6</sup>    | N/A                     | 9.25 x 10 <sup>-3</sup> | 3.17 x 10 <sup>-6</sup> | B/D                                               | -110.41                                         |
| 48                                                                          | 2.08 x 10 <sup>5</sup> | 4.21 x 10 <sup>6</sup>    | N/A                     | 9.24 x 10 <sup>-3</sup> | 7.50 x 10 <sup>-6</sup> | B/D                                               | -107.88                                         |
| 72                                                                          | 2.08 x 10 <sup>5</sup> | 4.17 x 10 <sup>6</sup>    | N/A                     | 9.24 x 10 <sup>-3</sup> | 1.60 x 10 <sup>-5</sup> | B/D                                               | -105.65                                         |
| 96                                                                          | 3.17 x 10 <sup>5</sup> | 4.19 x 10 <sup>6</sup>    | N/A                     | 4.60 x 10 <sup>-3</sup> | 3.63 x 10 <sup>-5</sup> | B/D                                               | -101.15                                         |
| 120                                                                         | 8.17 x 10 <sup>5</sup> | 4.57 x 10 <sup>6</sup>    | N/A                     | 9.10 x 10 <sup>-3</sup> | 1.56 x 10 <sup>-4</sup> | B/D                                               | -98.92                                          |
| 144                                                                         | 1.22 x 10 <sup>6</sup> | 5.21 x 10 <sup>6</sup>    | N/A                     | 8.84 x 10 <sup>-3</sup> | 4.09 x 10 <sup>-4</sup> | B/D                                               | -96.01                                          |
| 168                                                                         | 2.33 x 10 <sup>6</sup> | 7.35 x 10 <sup>6</sup>    | N/A                     | 8.40 x 10 <sup>-3</sup> | 8.58 x 10 <sup>-4</sup> | B/D                                               | -93.70                                          |
| 192                                                                         | 4.05 x 10 <sup>6</sup> | 8.82 x 10 <sup>6</sup>    | N/A                     | 7.82 x 10 <sup>-3</sup> | 1.43 x 10 <sup>-3</sup> | B/D                                               | -92.00                                          |
| 216                                                                         | 8.59 x 10 <sup>6</sup> | 1.55 x 10 <sup>7</sup>    | N/A                     | 6.63 x 10 <sup>-3</sup> | 2.62 x 10 <sup>-3</sup> | B/D                                               | -89.75                                          |
| 240                                                                         | 1.39 x 10 <sup>7</sup> | 2.47 x 10 <sup>7</sup>    | N/A                     | 4.73 x 10 <sup>-3</sup> | 4.52 x 10 <sup>-3</sup> | B/D                                               | -87.16                                          |
| 264                                                                         | 1.40 x 10 <sup>7</sup> | 2.82 x 10 <sup>7</sup>    | N/A                     | 4.19 x 10 <sup>-3</sup> | 5.06 x 10 <sup>-3</sup> | B/D                                               | -86.47                                          |

71 <sup>1</sup>Calculated by subtracting SO<sub>4</sub><sup>2-</sup> in cultures from SO<sub>4</sub><sup>2-</sup> in abiotic controls.

72 Abbreviations: N/A, Not Applicable. B.D., Below Detection

73 Detection limits for Fe<sup>2+</sup> and SO<sub>4</sub><sup>2-</sup> are 0.3 and 5.0 μM respectively.  
74  
75  
76  
77  
78  
79  
80  
81  
82  
83  
84  
85  
86  
87  
88  
89  
90  
91  
92  
93  
94  
95

96 **Supplemental Table 4.** Number of cells, amount of carbon assimilated, and measured analyte  
 97 (H<sub>2</sub>S, Fe<sup>3+</sup>, Fe<sup>2+</sup>, and SO<sub>4</sub><sup>2-</sup>) where applicable during the specified times in cultures of *Acidianus*  
 98 sp. DS80 grown at 80°C in base salts medium (pH 3.0) with CO<sub>2</sub> as sole carbon source.  
 99

| Substrate H <sub>2</sub> /S <sup>0</sup> /Fe <sup>3+</sup> |                        |                        |                         |                         |                         |                                                |
|------------------------------------------------------------|------------------------|------------------------|-------------------------|-------------------------|-------------------------|------------------------------------------------|
| Time                                                       | Cells                  | CO <sub>2</sub> (fmol) | H <sub>2</sub> S (M)    | Fe <sup>3+</sup> (M)    | Fe <sup>2+</sup> (M)    | SO <sub>4</sub> <sup>2-</sup> (M) <sup>1</sup> |
| 0                                                          | 2.57 x 10 <sup>5</sup> | 4.07 x 10 <sup>6</sup> | 6.72 x 10 <sup>-8</sup> | 8.83 x 10 <sup>-3</sup> | 2.08 x 10 <sup>-5</sup> | B/D                                            |
| 24                                                         | 2.57 x 10 <sup>5</sup> | 4.07 x 10 <sup>6</sup> | 6.72 x 10 <sup>-8</sup> | 8.18 x 10 <sup>-3</sup> | 4.76 x 10 <sup>-4</sup> | B/D                                            |
| 48                                                         | 6.83 x 10 <sup>5</sup> | 4.56 x 10 <sup>6</sup> | 1.88 x 10 <sup>-5</sup> | 7.54 x 10 <sup>-3</sup> | 1.04 x 10 <sup>-3</sup> | B/D                                            |
| 72                                                         | 2.27 x 10 <sup>6</sup> | 5.97 x 10 <sup>6</sup> | 1.33 x 10 <sup>-4</sup> | 4.06 x 10 <sup>-3</sup> | 2.76 x 10 <sup>-3</sup> | B/D                                            |
| 96                                                         | 3.44 x 10 <sup>6</sup> | 7.19 x 10 <sup>6</sup> | 3.35 x 10 <sup>-4</sup> | 2.37 x 10 <sup>-3</sup> | 2.28 x 10 <sup>-3</sup> | B/D                                            |
| 120                                                        | 5.82 x 10 <sup>6</sup> | 1.43 x 10 <sup>7</sup> | 5.85 x 10 <sup>-4</sup> | 1.26 x 10 <sup>-4</sup> | 4.78 x 10 <sup>-4</sup> | B/D                                            |
| 144                                                        | 7.05 x 10 <sup>6</sup> | 1.73 x 10 <sup>6</sup> | 1.27 x 10 <sup>-3</sup> | 4.48 x 10 <sup>-6</sup> | 3.72 x 10 <sup>-5</sup> | B/D                                            |
| 168                                                        | 7.52 x 10 <sup>6</sup> | 2.01 x 10 <sup>6</sup> | 1.41 x 10 <sup>-3</sup> | 6.98 x 10 <sup>-6</sup> | 1.31 x 10 <sup>-5</sup> | B/D                                            |

<sup>1</sup>Calculated by subtracting SO<sub>4</sub><sup>2-</sup> in cultures from SO<sub>4</sub><sup>2-</sup> in abiotic controls.

Abbreviations: B.D., Below Detection

Detection limits for SO<sub>4</sub><sup>2-</sup> is 5 μM respectively.

100  
101  
102  
103  
104  
105  
106  
107  
108  
109  
110  
111  
112  
113  
114  
115  
116  
117  
118  
119  
120  
121  
122  
123  
124  
125  
126  
127

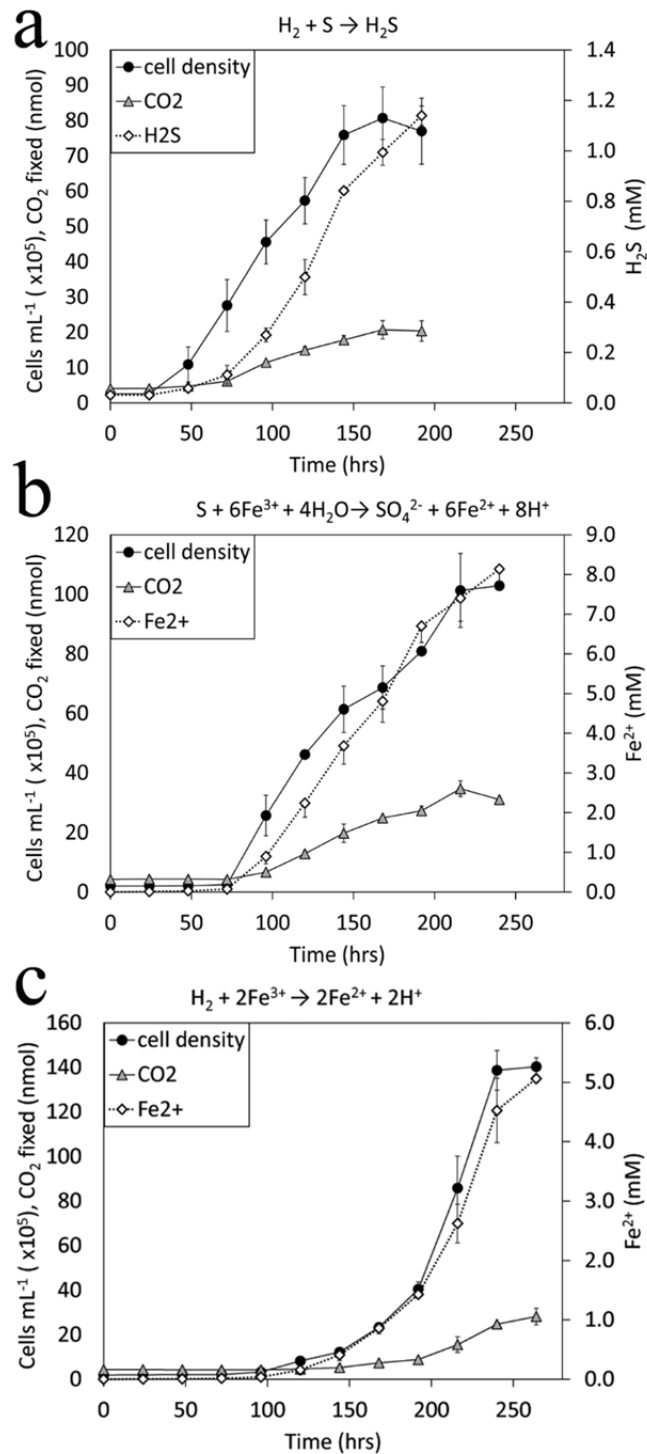

128  
 129 **Supplemental Figure 1.** Growth kinetics and substrate transformation activities of cultures of  
 130 DS80 grown with  $H_2/S^{\circ}$  (a),  $S^{\circ}/Fe^{3+}$  (as ferric sulfate) (b), or  $H_2/Fe^{3+}$  (as ferric sulfate) (c). All  
 131 cultures were provided with  $CO_2$  as a carbon source. Error bars reflect the standard deviation of  
 132 measurements made on three separate cultures.

133  
 134

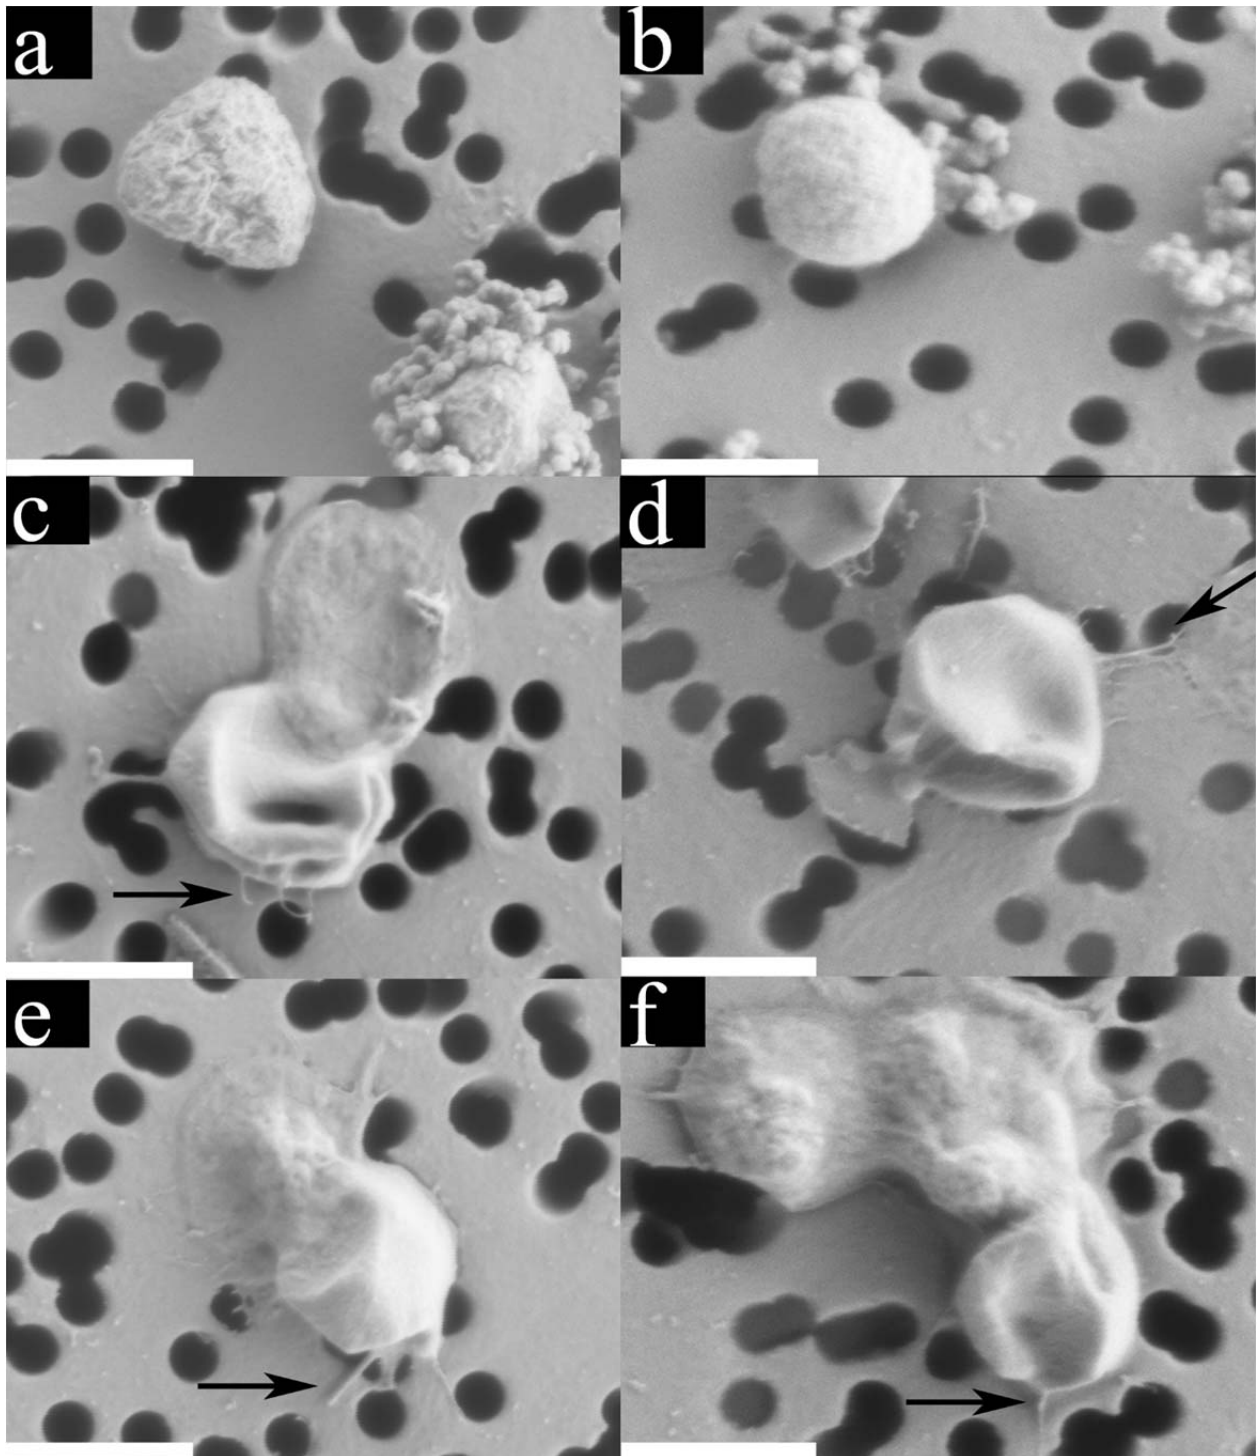

135  
136  
137  
138  
139

**Supplemental Figure 2.** Field emission scanning electron micrographs (FE SEMs) of cells grown with  $H_2/S^\circ$  (a,b),  $S^\circ/Fe^{3+}$  (c,d), and  $H_2/Fe^{3+}$  (e,f) with arrows denoting pilin-like structures where present. Scale bars represent 1000 nm.

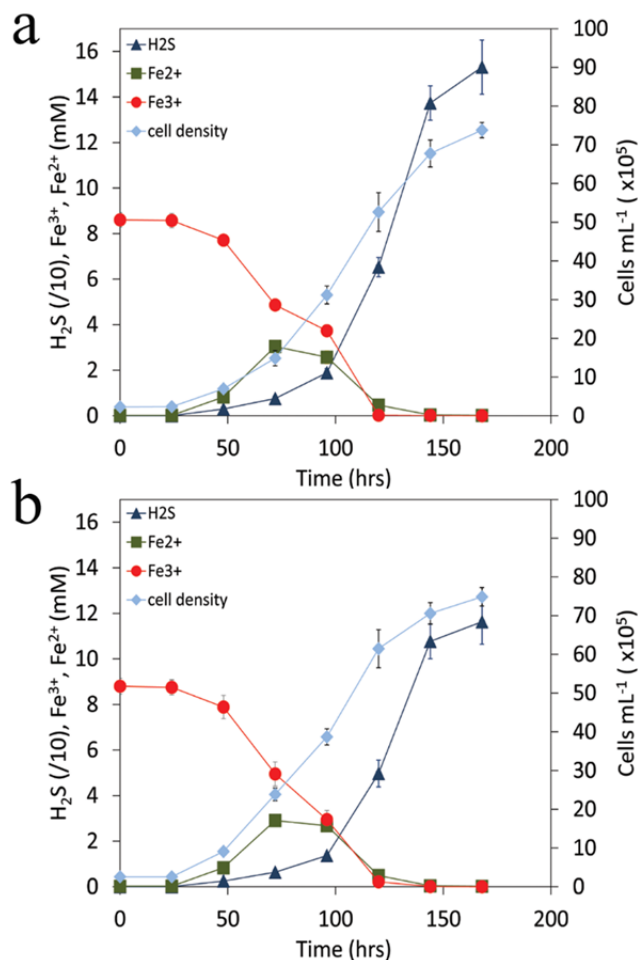

140  
 141 **Supplemental Figure 3.** Growth kinetics and substrate transformation activities of cultures of  
 142 DS80 grown with H<sub>2</sub>/S<sup>0</sup>/Fe<sup>3+</sup> (as ferric sulfate). The inoculum used in experiments presented in  
 143 the “a” panel was grown with S<sup>0</sup>/Fe<sup>3+</sup> (as ferric sulfate) whereas the inoculum used in  
 144 experiments presented in the “b” panel was grown with H<sub>2</sub>/Fe<sup>3+</sup> (as ferric sulfate). All cultures  
 145 were provided with CO<sub>2</sub> as a carbon source. Error bars reflect the standard deviation of  
 146 measurements made on three separate cultures.

147  
 148  
 149  
 150  
 151  
 152  
 153  
 154  
 155  
 156  
 157  
 158  
 159

160

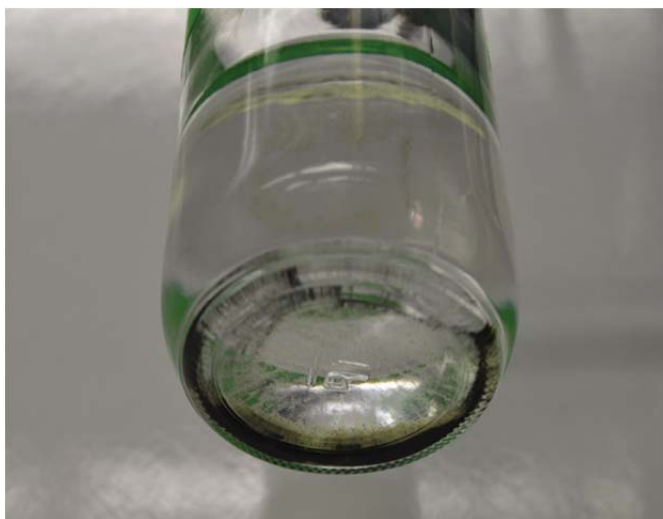

161

162

163

164

165

166

167

168

169

170

171

172

173

174

175

176

177

**Supplemental Figure 4.** Insoluble, black iron sulfide precipitates produced during microbial growth in medium containing  $\text{H}_2/\text{S}^\ominus/\text{Fe}^{3+}$ .



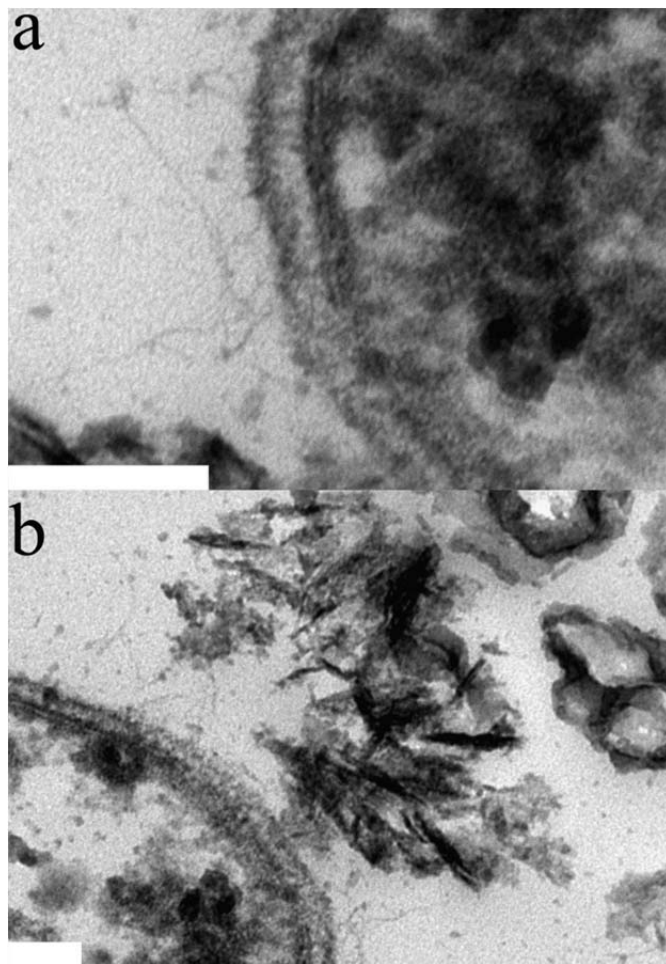

178  
179 **Supplemental Figure 5.** Thin section transmission electron micrographs (TEMs) of cells grown  
180 with the  $\text{H}_2/\text{Fe}^{3+}$  redox couple (a). Scale bars represent 100 nm. Both images show the presence  
181 of a precipitate of unknown composition (b).

182  
183  
184  
185  
186  
187  
188  
189

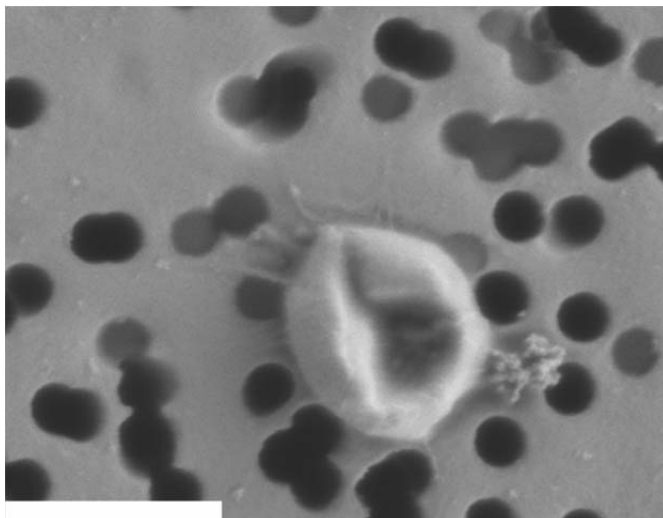

190  
191 **Supplemental Figure 6.** Field emission scanning electron micrograph (FE SEM) of cells grown  
192 with H<sub>2</sub>/ferrihydrite. Scale bar represent 1000 nm.  
193

194  
195  
196  
197  
198  
199  
200  
201  
202  
203  
204  
205  
206  
207  
208
